# Supplementary material for: Pathological Proteins Are Transported by Extracellular Vesicles of Sporadic Amyotrophic Lateral Sclerosis Patients
Source: PubMed Central journal article supplement (PMC6060258; doi:10.3389/fnins.2018.00487), 2018-07-19

## Supplementary Material

### Pathological proteins are transported by extracellular vesicles of sporadic Amyotrophic Lateral Sclerosis patients

Daisy Sproviero<sup>1</sup>, Sabrina La Salvia<sup>1</sup>, Marta Giannini<sup>1,2</sup>, Valeria Crippa<sup>3</sup>, Stella Gagliardi<sup>1</sup>, Stefano Bernuzzi<sup>4</sup>, Luca Diamanti<sup>2,5</sup>, Mauro Ceroni<sup>2,5</sup>, Orietta Pansarasa<sup>1</sup>, Angelo Poletti<sup>3</sup>, Cristina Cereda<sup>1\*</sup>.

\* **Correspondence:** Dr. Cristina Cereda, e-mail: [cristina.cereda@mondino.it](mailto:cristina.cereda@mondino.it)

**Supplementary Figure 1.** Transmission electron microscopy (TEM) of MVs and EXOs of an ALS patient and a healthy control. Diameter of MVs and of EXOs from ALS patients were significantly higher than healthy donors (A and B for MVs; C and D for EXOs). Exosomes were negatively stained with 2% uracyl acetate.

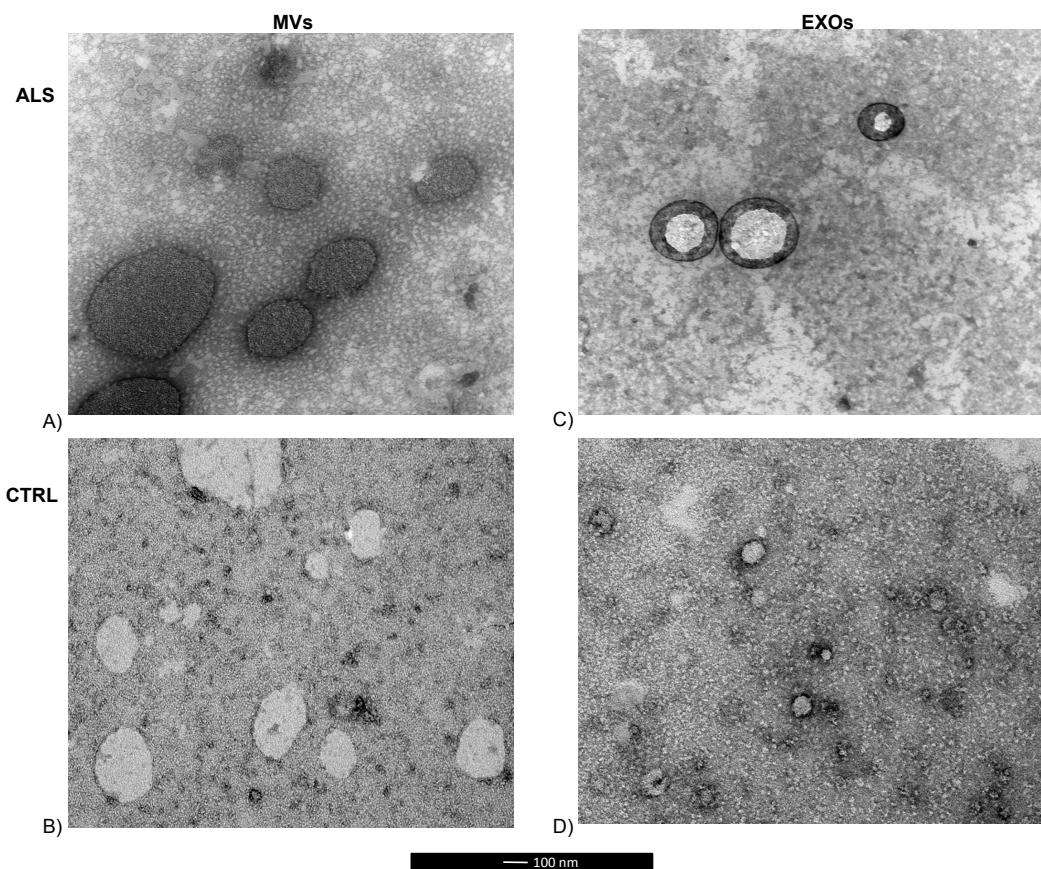

**Supplementary Figure 2.** Immunoblots of MVs and EXOs (30  $\mu$ g protein) from plasma of two healthy donors (CTRL1 and CTRL2-MVs-lane 1, 2; CTRL1 and CTRL2-EXOs-lane 5, 6) and two ALS patients (ALS1 and ALS2-MVs-lane 3, 4; ALS1 and ALS2-EXOs-lane 7, 8) with anti-TDP-43 and p-TDP-43 (A) and anti-SOD1(B). Black squares show the cropping locations.

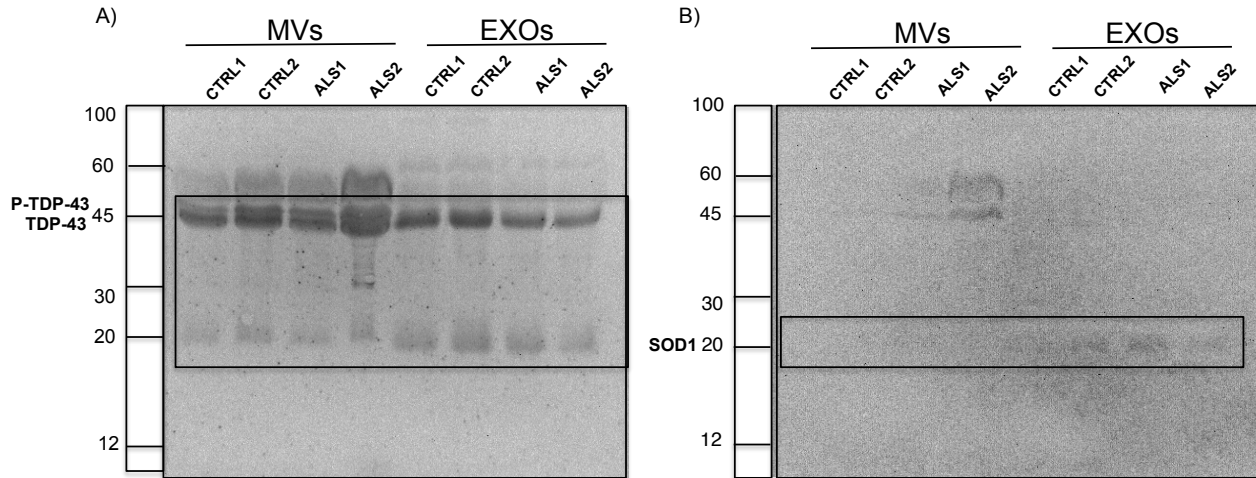

**Supplementary Figure 3.** Immunoblots of MVs and EXOs (30  $\mu$ g protein) from plasma of two healthy donors (CTRL1 and CTRL2-MVs-lane 1, 2; CTRL1 and CTRL2-EXOs-lane 5, 6) and two ALS patients (ALS1 and ALS2-MVs-lane 3, 4; ALS1 and ALS2-EXOs-lane 7, 8) with anti-SOD1-3H1 (A) and anti-FUS (B). Black squares show the cropping locations.

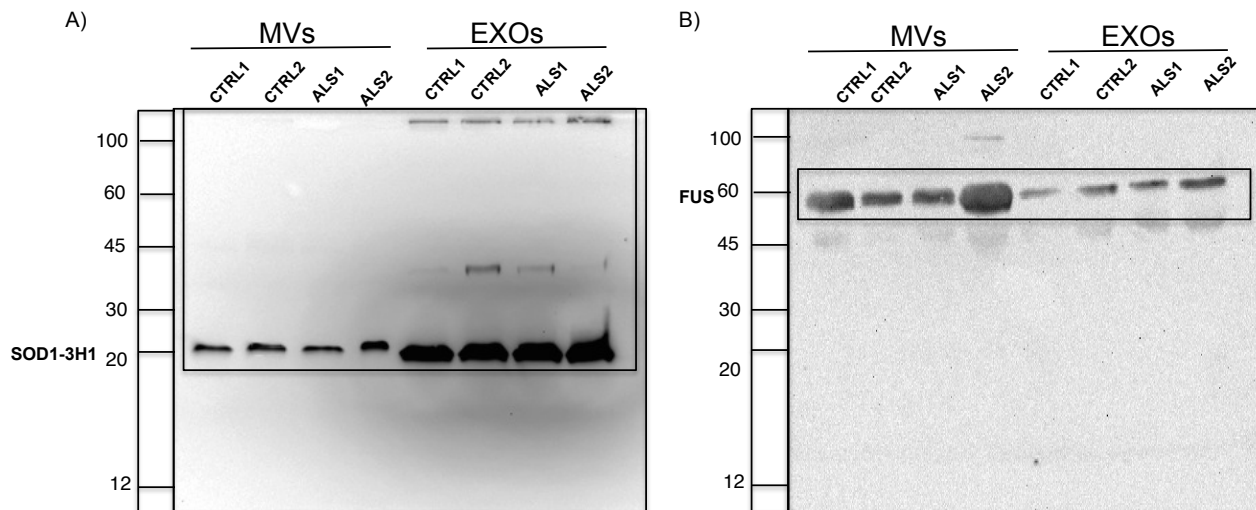

**Supplementary Figure 4.** Immunoblots of MVs and EXOs (30  $\mu$ g protein) from plasma of two healthy donors (CTRL1 and CTRL2-MVs-lane 1, 2; CTRL1 and CTRL2-EXOs-lane 5, 6) and two ALS patients (ALS1 and ALS2-MVs-lane 3, 4; ALS1 and ALS2-EXOs-lane 7, 8) with anti-Annexin V (A) and anti-Alix (B). Black squares show the cropping locations.

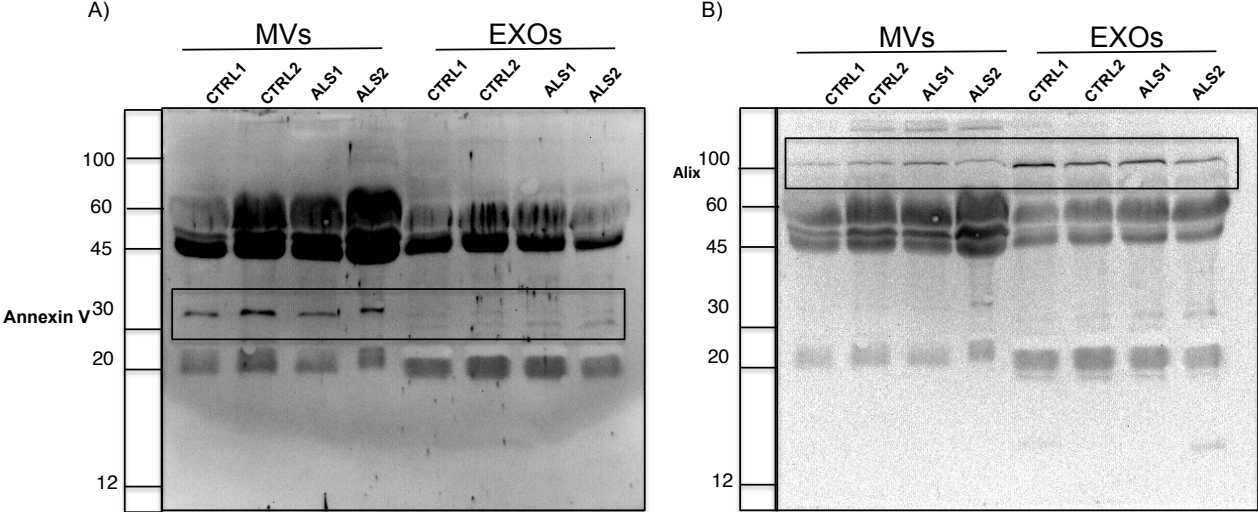

Supplement: Image_1.pdf [file Image_1.pdf]
